# Supplementary material for: Placental methylome analysis from a prospective autism study
Source: PubMed Central journal article supplement (PMC5159983; doi:10.1186/s13229-016-0114-8), 2016-12-15
Supplement: 13229_2016_114_MOESM2_ESM.pdf [file 13229_2016_114_MOESM2_ESM.pdf]

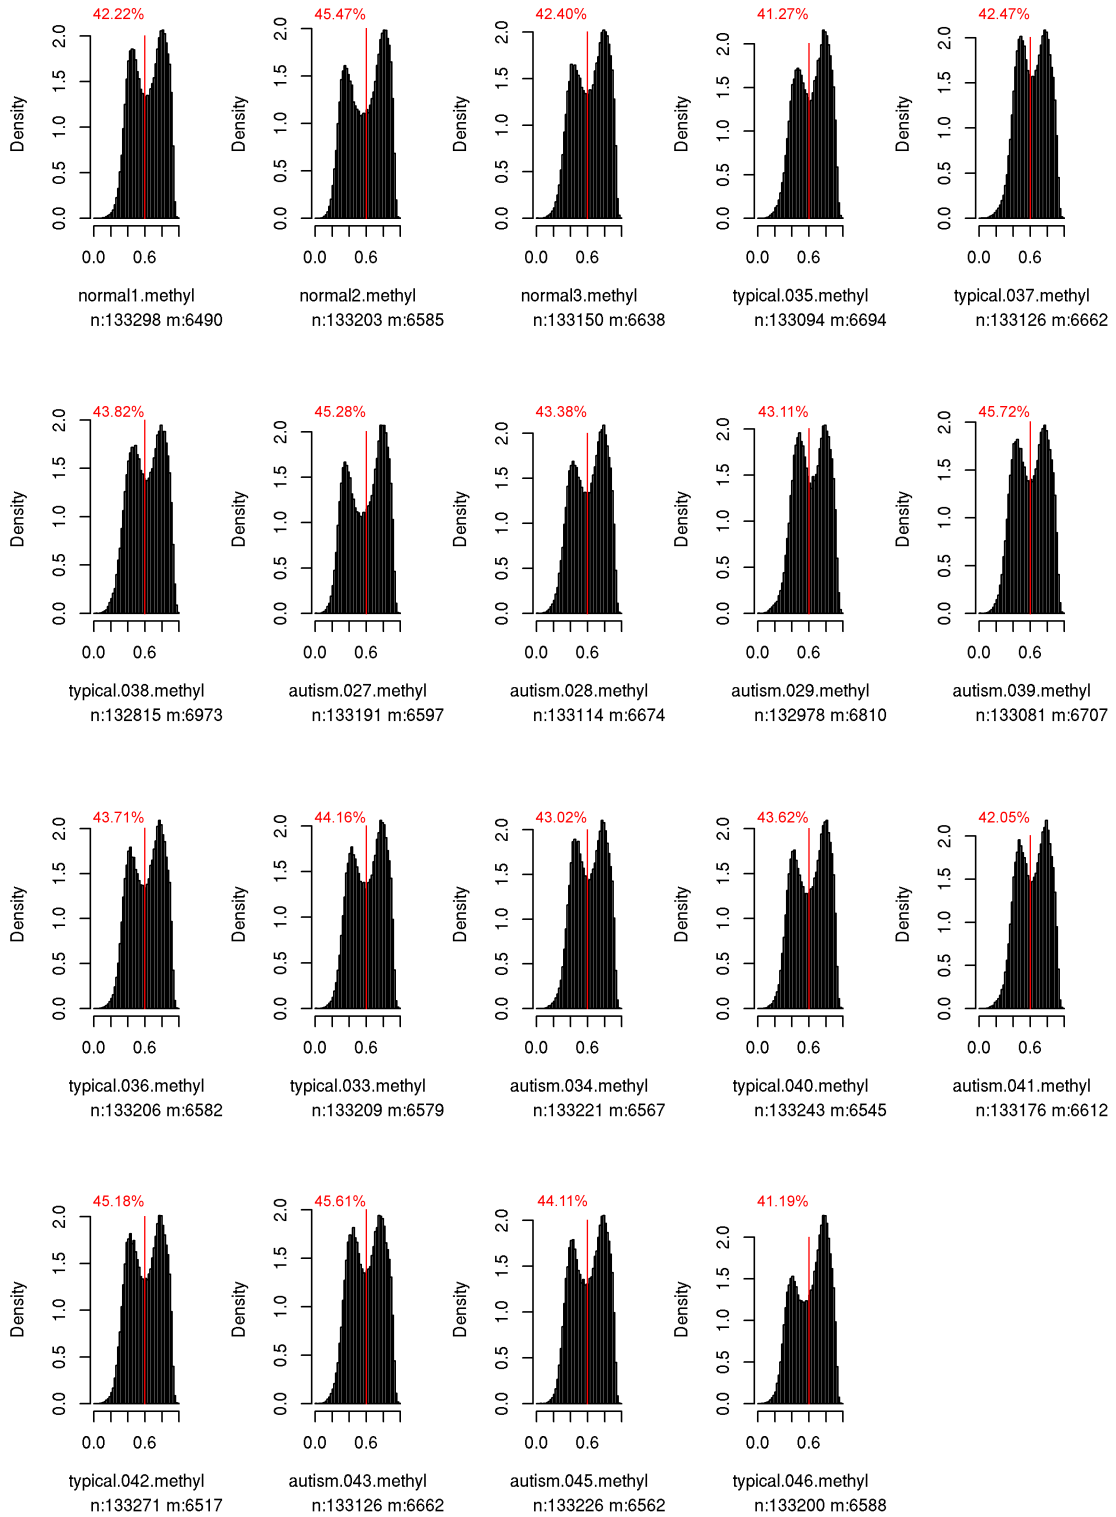

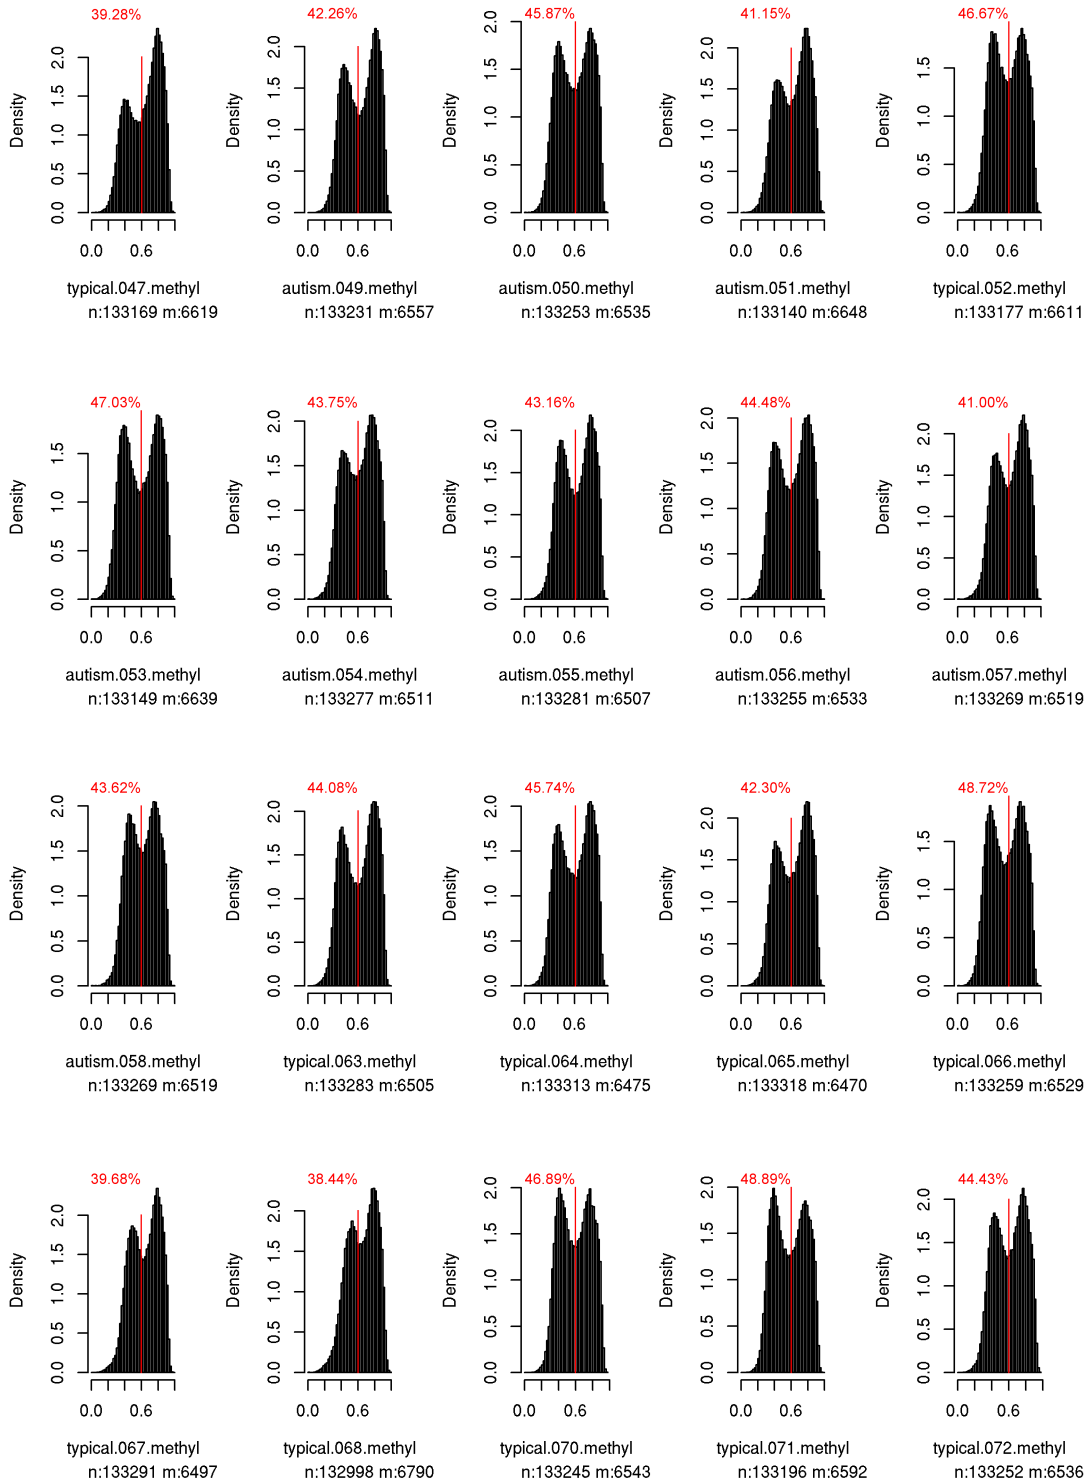

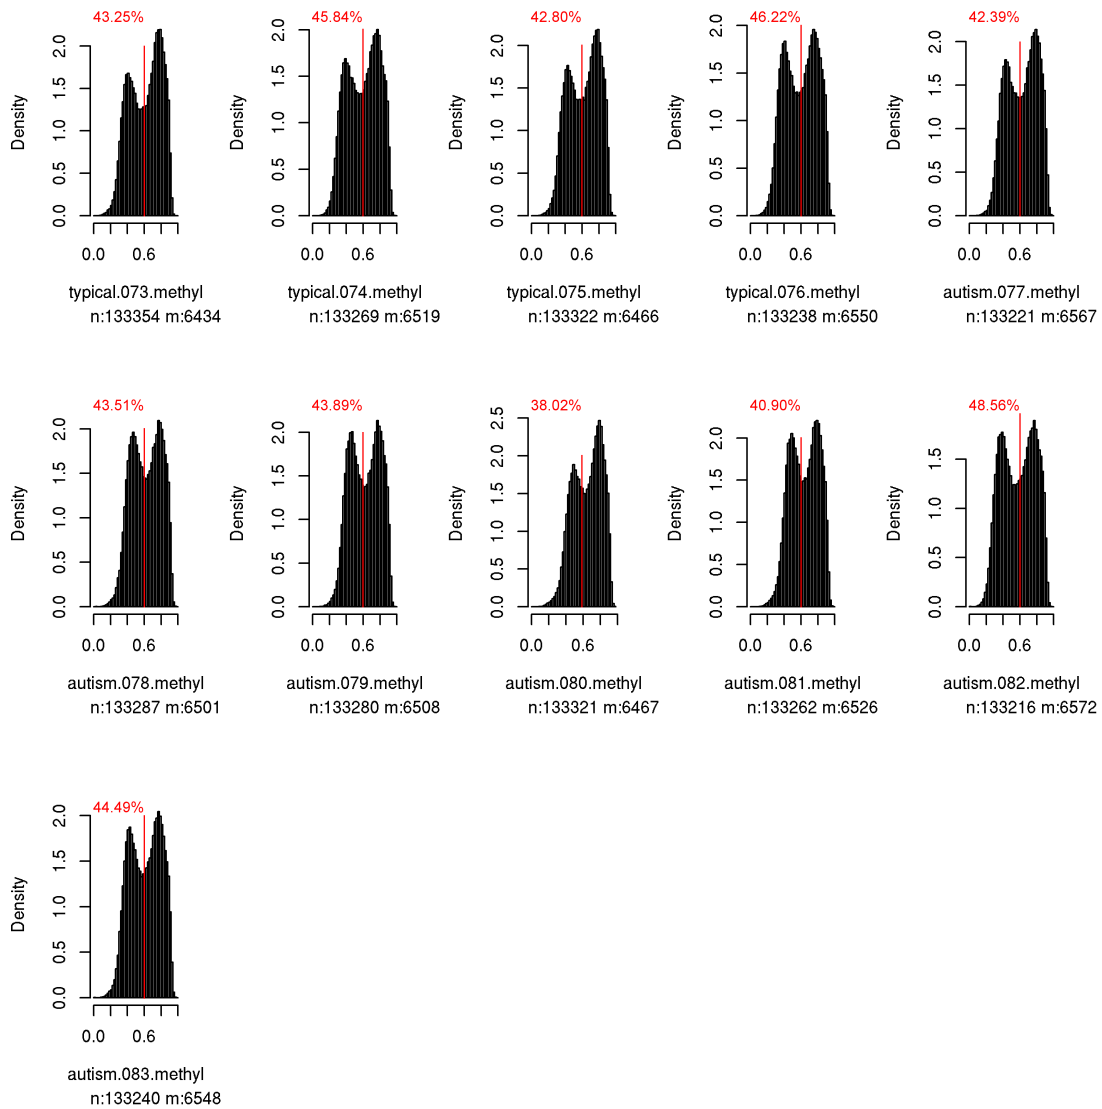

**Figures S1: Histograms of average methylation in 20 kb windows for each placenta sample.**

Individual histograms (no smoothing) for each MARBLES typical and autism placenta as well as three biological replicates of “normal” non-MARBLES placentas which no known pathologies (Schroeder DI et al., 2013). Methylation data was omitted if a window had fewer than 20 covered CpG sites. Red vertical lines show the arbitrary 60% methylation cutoff between windows with low and high methylation. Percentage of 20 kb windows with average methylation below 60% also shown in red (excluding omitted windows). n=number of windows with required CpG coverage, m=number of windows omitted due to insufficient coverage

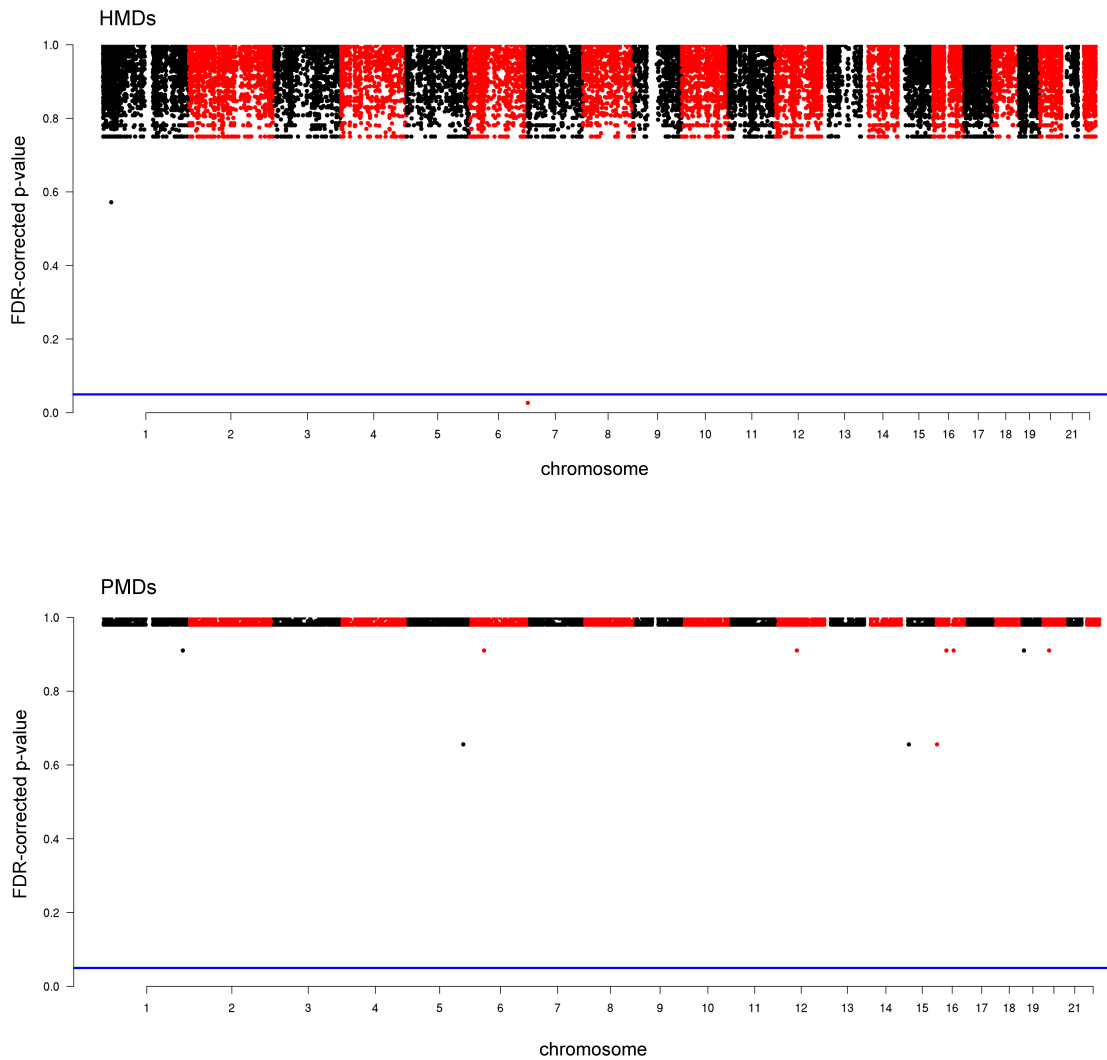

**Figure S2: Plots showing location and statistical significance of differential methylation in HMDs and PMDs.**

Each point shows the FDR-corrected probability of that HMD/PMD being differentially methylated between autism and typical MARBLES placentas. Chromosomes are alternately colored red and black for clarity. The blue line shows the 0.05 cutoff for statistical significance.

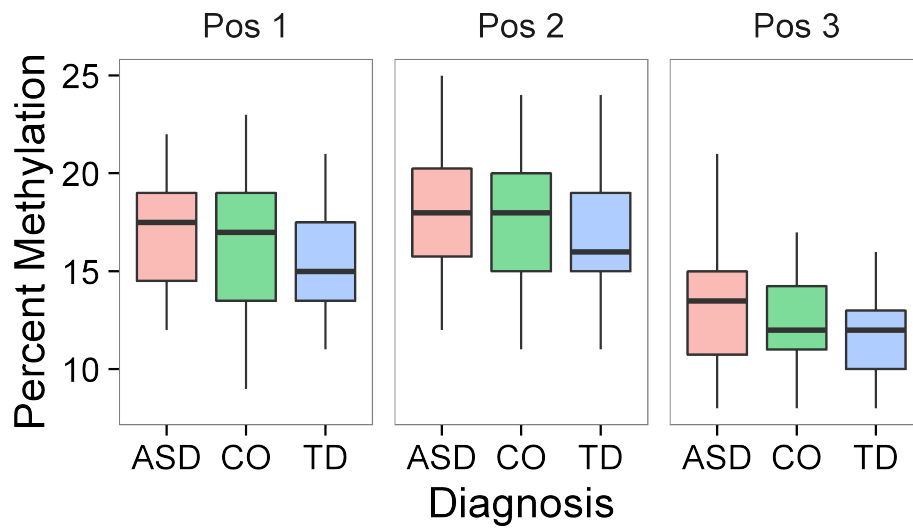

**Figure S3: *DLL1* Pyrosequencing results by individual CpG position.** Three CpG sites corresponding to the H3K27ac/H3K4me1 peaks were assayed by pyrosequencing on the same samples analyzed by MethylC-seq (region shown by grey bar in Figure 4A within circled HMD).
